# Supplementary material
Source: Springer Nature journal article supplement (https://www.springermedizin.de/resource/supplementary/12902_2009_91_MOESM2_ESM.pdf/9515474)

◇ Baseline    ■ Study end

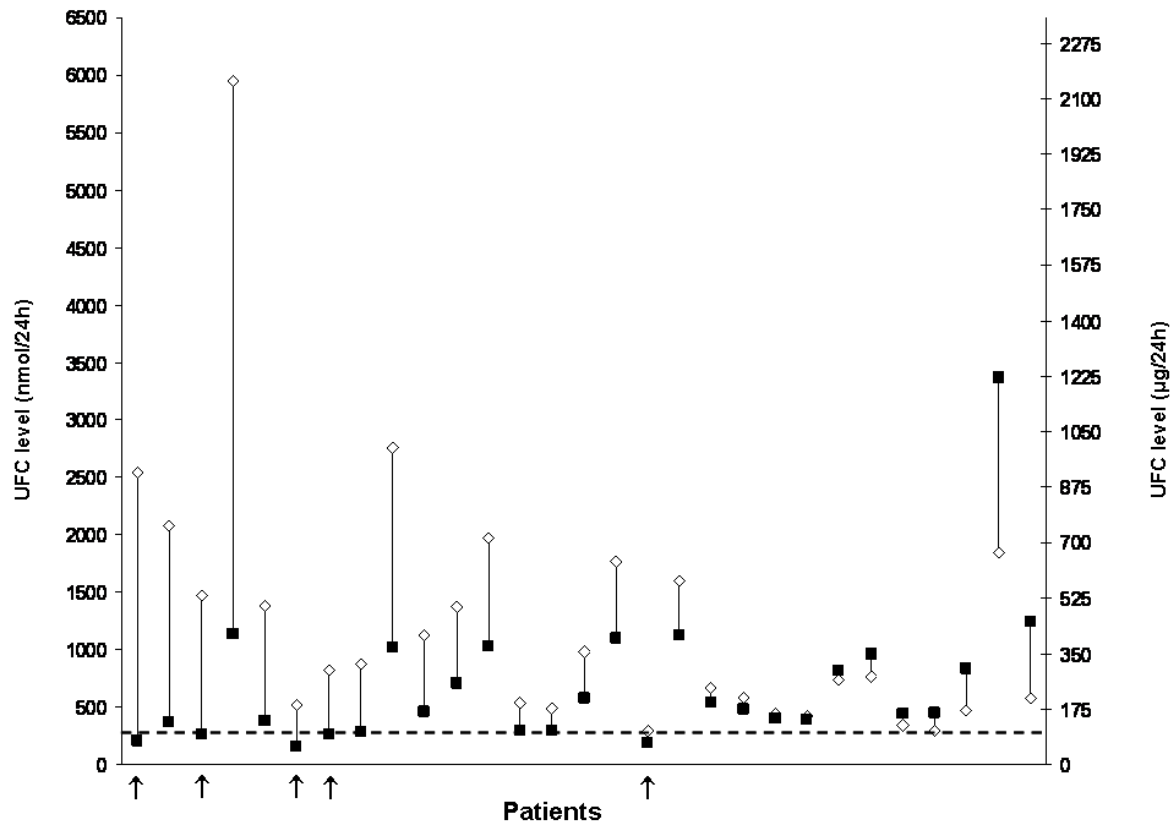

Supplement: MOESM2 [file 9515474]
